# Supplementary material for: Identification of Doxorubicin as Repurposing Inhibitory Drug for MERS-CoV PLpro
Source: MDPI journal article supplement (doi:10.3390/molecules27217553), 2022-11-04
Supplement: s1 [file s1]

## Article

# Identification of Doxorubicin as Repurposing Inhibitory Drug for MERS-CoV PLpro

Ahmed L. Alaofi <sup>1,\*</sup>, Mudassar Shahid <sup>1</sup>, Mohammad Raish <sup>1</sup>, Mushtaq Ahmad Ansari <sup>2</sup>, Rabbani Syed <sup>1</sup> and Mohd Abul Kalam <sup>1</sup>

<sup>1</sup> Department of Pharmaceutics, College of Pharmacy, King Saud University, P.O. Box 2457, Riyadh 11451, Saudi Arabia

<sup>2</sup> Department of Pharmacology and Toxicology, College of Pharmacy, King Saud University, P.O. Box 2457, Riyadh 11451, Saudi Arabia

\* Correspondence: [ahmedofi@ksu.edu.sa](mailto:ahmedofi@ksu.edu.sa); King Saud University, Riyadh KSA, Pharmaceutics Department, College of Pharmacy Building 23, Ground Floor, Office AA 67. P.O. Box 2457 Riyadh 11451, Saudi Arabia (Tel) +966114677364 (Fax) +966114676383

**Abstract:** The Middle East Respiratory Syndrome coronavirus (MERS-CoV), belonging to betacoronavirus genus can cause severe respiratory illnesses, accompanied by pneumonia, multi-organ failure, and ultimately death. Coronaviruses (CoVs) have the ability to transgress-species barrier and spread swiftly into new host species especially human to human transmission causing epidemic diseases. Despite the severe public health threat of MERS-CoV there are currently no vaccines or drugs available for its treatment. MERS-CoV papain-like protease (PLpro) is a key enzyme that plays an important role in its replication. In the present study, we evaluated the inhibitory activities of Doxorubicin (DOX) against the recombinant MERS-CoV PLpro by employing protease inhibition assay, the hydrolysis of fluorogenic peptide from Z-RLRGG-AMC-peptide bond in presence of DOX showed IC<sub>50</sub> value of 1.67  $\mu$ M at 30 minutes. Subsequently, we confirmed the interaction between DOX and MERS-CoV PLpro by Thermal shift assay (TSA), DOX increased  $\Delta T_m$  by  $\sim 20^\circ\text{C}$  clearly indicating a coherent interaction between the MERS-CoV PL protease and DOX. The binding site of DOX on MERS-CoV PLpro was assessed using docking techniques as well as molecular dynamic (MD) simulations. DOX bind to the thumb region of the catalytic domain of the MERS-CoV PLpro. Moreover, MD simulations results showed flexible BL2 loops as well as other potential residues such as R231, R233, and G276 of MERS-CoV PLpro. Development of drug repurposing is a remarkable opportunity to quickly examine the efficacy of different aspects of treating various diseases. Protease inhibitors have been found to be effective against MERS-CoV to date, and numerous candidates are currently undergoing clinical trials to prove this and our effort is in similar direction.

**Keywords:** Middle East Respiratory Syndrome coronavirus; Papain-like protease; Doxorubicin.

**Citation:** Alaofi, A.L.; Shahid, M.; Raish, M.; Ansari, M.A.; Syed, R.; Kalam, M.A. Identification of Doxorubicin as Repurposing Inhibitory Drug for MERS-CoV PLpro. *Molecules* **2022**, *27*, 7553. <https://doi.org/10.3390/molecules27217553>

Academic Editors: Rosanna Di Paola and Rosalba Siracusa

Received: 24 September 2022

Accepted: 30 October 2022

Published: 4 November 2022

**Publisher's Note:** MDPI stays neutral with regard to jurisdictional claims in published maps and institutional affiliations.

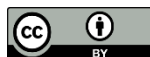

**Copyright:** © 2022 by the authors. Licensee MDPI, Basel, Switzerland. This article is an open access article distributed under the terms and conditions of the Creative Commons Attribution (CC BY) license (<https://creativecommons.org/licenses/by/4.0/>).

**Table S1. IC<sub>50</sub> of MERS-CoV PLpro inhibition identified by dissociation of Z-RLRGG-AMC substrate against DOX at different time intervals.**

|                        | 30 minutes | 60 minutes |
|------------------------|------------|------------|
| IC <sub>50</sub> µg/mL | 1.992      | 1.705      |
| R <sup>2</sup>         | 0.8857     | 0.8619     |
